# Supplementary material for: Design of an integrated biorefinery for bioethylene production from industrial forest byproducts
Source: Royal Society of Chemistry journal article supplement (doi:10.1039/d4gc00327f), 2024-01-01
Supplement: d4gc00327f1.pdf [file d4gc00327f1.pdf]

**Supplementary information**

Table S1 lists the potential critical parameters selected according to the bibliography. Each parameter has the distribution to which it belongs, the minimum, most likely, and maximum values.

Table S1. Sensitivity analysis configuration.

| Parameter                      | Distribution function                                                                                               | Value   |             |         | Units               | Standard deviation |
|--------------------------------|---------------------------------------------------------------------------------------------------------------------|---------|-------------|---------|---------------------|--------------------|
|                                |                                                                                                                     | Minimum | Most likely | Maximum |                     |                    |
| Ethylene price <sup>1,2</sup>  | <br>Triangular <sup>3,4</sup>      | 700     | 1400        | 1680    | USD/t               |                    |
| Lignin price <sup>1</sup>      | <br>Triangular <sup>3</sup>        | 400     | 800         | 960     | USD/t               |                    |
| Feedstock cost <sup>1,5</sup>  | <br>Normal <sup>6</sup>            |         | 9           |         | USD/t               | 10% $\mu$          |
| Water <sup>7</sup>             | <br>Uniform <sup>3</sup>           | 0.5     | 0.6         | 0.8     | USD/m <sup>3</sup>  |                    |
| Ethanol <sup>2</sup>           | <br>Normal <sup>8</sup>           |         | 887         |         | USD/t               | 10% $\mu$          |
| NaOH                           | <br>Uniform <sup>a</sup>         | 500     | 600         | 700     | USD/t               |                    |
| H <sub>2</sub> SO <sub>4</sub> | <br>Uniform <sup>a</sup>         | 80      | 90          | 100     | USD/t               |                    |
| Enzymes cost <sup>9</sup>      | <br>Triangular <sup>6</sup>      | 8,000   | 10,000      | 15,000  | USD/t               |                    |
| Electricity cost <sup>1</sup>  | <br>Triangular <sup>4,6,10</sup> | 0.03    | 0.08        | 0.09    | USD/kWh             |                    |
| Steam cost <sup>1</sup>        | <br>Triangular <sup>6</sup>      | 8       | 10          | 15      | USD/t               |                    |
| SSF conversion <sup>9</sup>    | <br>Uniform <sup>9,11</sup>      | 0.94    | 0.96        | 0.98    | g ethanol /g liquor |                    |
| LSR pretreatment <sup>9</sup>  | <br>Normal <sup>a</sup>          |         | 5.44        |         | t/t                 | 10% $\mu$          |
| Steam economy <sup>9</sup>     | <br>Uniform <sup>11</sup>        | 2.5     | 2.6         | 2.8     | t steam/<br>t IS    |                    |

<sup>a</sup> Assumption

|                                     |                                                                                   |           |           |           |                      |            |
|-------------------------------------|-----------------------------------------------------------------------------------|-----------|-----------|-----------|----------------------|------------|
| Availability feedstock <sup>5</sup> | 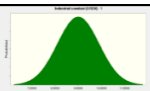 |           | 200,000   |           | t                    | 10 % $\mu$ |
|                                     | Normal <sup>a</sup>                                                               |           |           |           |                      |            |
| Labor <sup>9</sup>                  |  | 1,126,400 | 10,76,400 | 1,026,400 | USD                  |            |
|                                     | Triangular <sup>10</sup>                                                          |           |           |           |                      |            |
| Optimal washing ratio <sup>9</sup>  |  | 4         | 3.5       | 3         | kg water/kg dry pulp |            |
|                                     | Triangular <sup>a</sup>                                                           |           |           |           |                      |            |
| Contingency factor                  |  | 5         | 10        | 15        | %                    |            |
|                                     | Triangular <sup>10</sup>                                                          |           |           |           |                      |            |

<sup>a</sup> Assumption

## References

- 1 R. Nitzsche, M. Budzinski and A. Gröngröft, *Bioresour. Technol.*, 2016, **200**, 928–939.
- 2 M. Frosi, A. Tripodi, F. Conte, G. Ramis, N. Mahinpey and I. Rossetti, *J. Ind. Eng. Chem.*, 2021, **104**, 272–285.
- 3 N. I. Vollmer, K. V. Gernaey and G. Sin, *Front. Chem. Eng.*, DOI:10.3389/fceng.2022.838478.
- 4 Y. Cortes-Peña, D. Kumar, V. Singh and J. S. Guest, *ACS Sustain. Chem. Eng.*, 2020, **8**, 3302–3310.
- 5 Anuj Kumar Chandel, V. K. Garlapati, A. K. Singh, F. A. F. Antunes and S. S. Silva, *Bioresour. Technol.*, 2018, **264**, 370–381.
- 6 G. Barjoveanu, O.-A. Pătrăuțanu, C. Teodosiu and I. Volf, *Sci. Rep.*, 2020, **10**, 13632.
- 7 N. M. Clauser, F. E. Felissia, M. C. Area, M. E. Vallejos and S. Gutiérrez, *J. Clean. Prod.*, 2020, **257**, 1–11.
- 8 D. Kumar, S. P. Long, A. Arora and V. Singh, *GCB Bioenergy*, 2021, **13**, 1498–1514.
- 9 N. M. Clauser, F. E. Felissia, M. C. Area and M. E. Vallejos, *Chem. Eng. Res. Des.*, DOI:https://doi.org/10.1016/j.cherd.2020.12.003.
- 10 P. Pérez-López, M. Montazeri, G. Feijoo, M. T. Moreira and M. J. Eckelman, *Sci. Total Environ.*, 2018, **626**, 762–775.
- 11 C. A. de Assis, R. Gonzalez, S. Kelley, H. Jameel, T. Bilek, J. Daystar, R. H. Eld, J. Golden, J. Prestemon and D. Singh, *Biofuels, Bioprod. Biorefining*, 2017, 246–256.

Table S2 displays the values depicted in Figure 6: Tornado charts.

Table S2. Tornado charts values

| Input variable                             | NPV             |                 |                 | Variation explanation <sup>1</sup> |
|--------------------------------------------|-----------------|-----------------|-----------------|------------------------------------|
|                                            | Down            | Up              | Range           |                                    |
| Lignin selling price (USD/t)               | -75.323.180 USD | 37.426.345 USD  | 112.749.525 USD | 41,08%                             |
| Ethylene selling price (USD/t)             | -66.943.417 USD | 34.074.439 USD  | 101.017.856 USD | 74,06%                             |
| Energy (USD/kWh)                           | 59.118.263 USD  | -5.569.019 USD  | 64.687.282 USD  | 87,58%                             |
| LSR pretreatment (w/w)                     | 22.295.948 USD  | -13.295.205 USD | 35.591.152 USD  | 91,68%                             |
| Enzymes (USD/kg)                           | 15.181.318 USD  | -19.710.613 USD | 34.891.931 USD  | 95,61%                             |
| Feedstock Availability (t/y)               | -8.112.592 USD  | 20.687.565 USD  | 28.800.157 USD  | 98,29%                             |
| Steam (USD/t)                              | 10.400.204 USD  | -7.757.829 USD  | 18.158.034 USD  | 99,36%                             |
| Ethanol (USD/L)                            | 8.064.728 USD   | 933.394 USD     | 7.131.334 USD   | 99,52%                             |
| Contingency factor (USD)                   | 8.765.796 USD   | 1.658.593 USD   | 7.107.203 USD   | 99,68%                             |
| NaOH (USD/kg)                              | 8.597.574 USD   | 1.826.815 USD   | 6.770.759 USD   | 99,83%                             |
| SSF conversion (%)                         | 2.425.818 USD   | 8.033.407 USD   | 5.607.589 USD   | 99,93%                             |
| Steam economy (t evaporated water/t steam) | 6.209.889 USD   | 3.216.806 USD   | 2.993.082 USD   | 99,96%                             |
| Industrial sawdust (USD/t)                 | 6.180.830 USD   | 3.274.924 USD   | 2.905.905 USD   | 99,99%                             |
| Water (USD/m <sup>3</sup> )                | 5.614.309 USD   | 4.407.966 USD   | 1.206.343 USD   | 99,99%                             |
| Optimal washing ratio (t water/t dry pulp) | 4.728.209 USD   | 5.696.181 USD   | 967.972 USD     | 100,00%                            |
| Labor (USD)                                | 5.672.296 USD   | 4.752.093 USD   | 920.203 USD     | 100,00%                            |
| H <sub>2</sub> SO <sub>4</sub> (USD/kg)    | 5.218.242 USD   | 5.206.147 USD   | 12.095 USD      | 100,00%                            |

<sup>1</sup> The explanation of variation 1 is cumulative
